# Supplementary material for: Nervous Necrosis Virus Modulation of European Sea Bass (Dicentrarchus labrax, L.) Immune Genes and Transcriptome towards Establishment of Virus Carrier State
Source: MDPI journal article supplement (doi:10.3390/ijms242316613), 2023-11-22
Supplement: s1 [file s1]

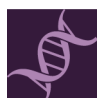

Article

# Nervous Necrosis Virus Modulation of European Sea Bass (*Dicentrarchus labrax*, L.) Immune Genes and Transcriptome towards Establishment of Virus Carrier State

Dimitra K. Toubanaki <sup>1</sup>, Antonia Efstathiou <sup>1</sup>, Odysseas-Panagiotis Tzortzatos <sup>1</sup>, Michail-Aggelos Valsamidis <sup>2</sup>, Leonidas Papaharisis <sup>3</sup>, Vasileios Bakopoulos <sup>2</sup> and Evdokia Karagouni <sup>1,\*</sup>

## Supplementary material

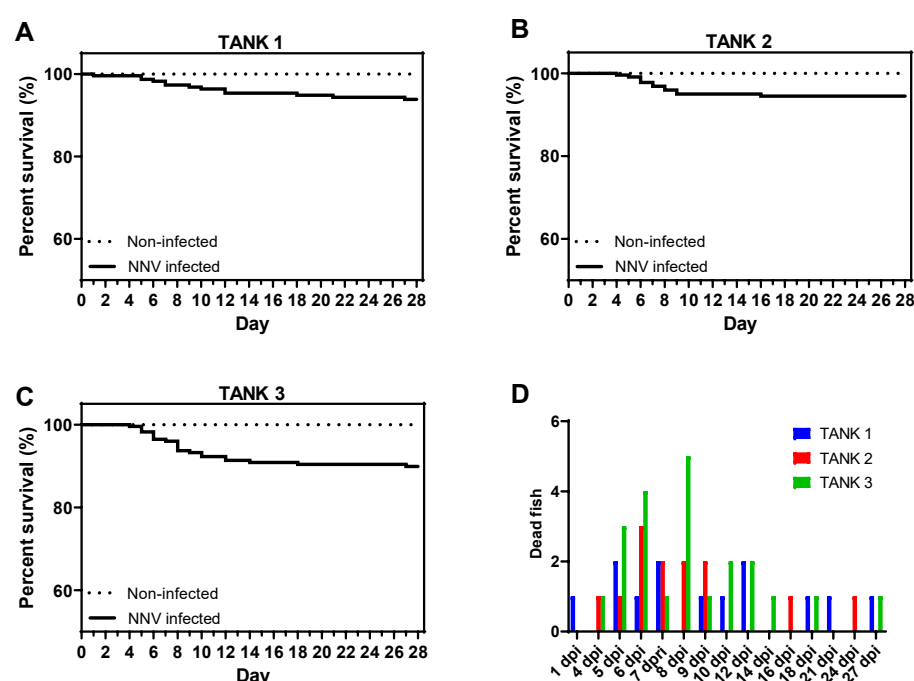

**Figure S1.** Cumulative survival of NNV challenged (continuous line) and non-infected (dashed line) fish groups in tank 1 (A), tank 2 (B) and tank 3 (C). (D) Dead fish in each experimental tank. Two-way ANOVA with Tukey's post test was applied to determine differences between dead fish number in each tank at different sampling time points. No significant differences were determined.

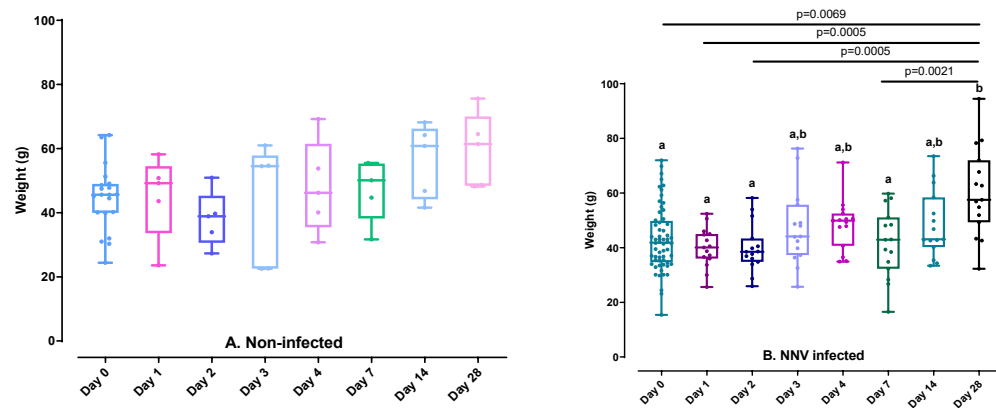

**Figure S2.** Weights of (A) non-infected and (B) NNV-challenged European sea bass for 0 to 28 dpi time points. Data are presented as bounds of box and whisker plots with min-to-max values. The line represents the median (non-infected:  $n = 5$  (20 for 0 dpi); NNV infected:  $n = 15$  (60 for 0 dpi)), the whiskers show the data range and the box shows the interquartile range. The unpaired t-test was used to determine statistical differences between infected and non-infected groups and one-way ANOVA with Dunn's post hoc test was applied to determine differences between sampling time points. Different lower-case letters denote statistically significant differences.

The condition factor (K) of a fish reflects physical and biological circumstances and fluctuations by interaction among feeding conditions, parasitic infections and physiological factors. This also indicates the changes in food reserves and therefore an indicator of the general fish condition [1].

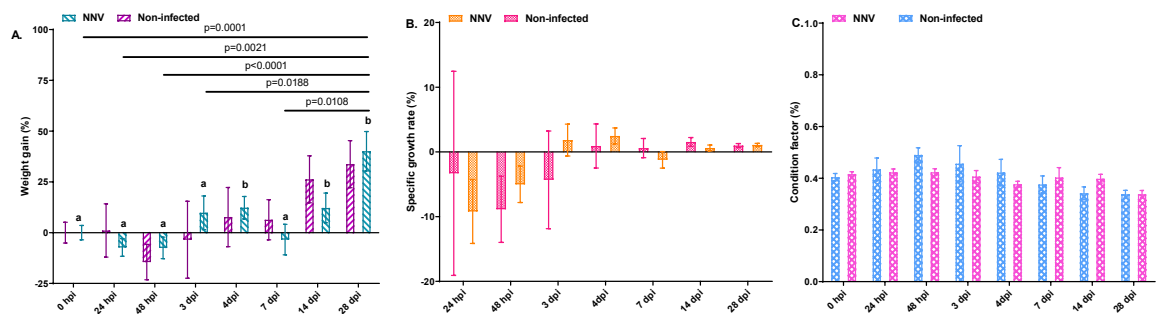

**Figure S3.** (A) Weight gain, (B) specific growth rate and (C) condition factor, of non-infected and NNV-challenged European sea bass for 0 to 28 dpi time points. Data are presented as means  $\pm$  SEM (non-infected:  $n = 5$  (20 for 0 dpi); NNV infected:  $n = 15$  (60 for 0 dpi)). Statistical differences were determined by two-way ANOVA followed by Tukey's multiple comparison test. Different lower-case letters denote statistically significant differences.

Splenosomatic index is the weight of the spleen expressed as a percentage of total body weight. Alterations in this index could indicate an abnormal condition in the spleen such as necrosis or swelling due to infection [2].

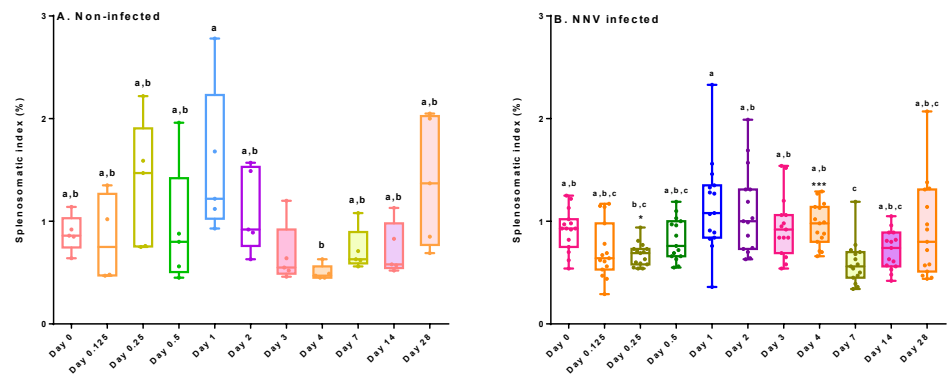

**Figure S4.** Splenosomatic indexes of **(A)** non-infected and **(B)** NNV-challenged European sea bass for 0 to 28 dpi time points. Data are presented as bounds of box and whisker plots with min-to-max values. The line represents the median (non-infected:  $n = 5$ ; NNV challenged:  $n = 15$ ), the whiskers show the data range and the box shows the interquartile range. The unpaired t-test was used to determine statistical differences between infected and non-infected groups (one asterisk indicate  $p < 0.05$ , three asterisks indicate  $p < 0.001$ ). One-way ANOVA with Dunn's post hoc test were applied to determine differences between sampling time points. Different lower-case letters denote statistically significant differences.

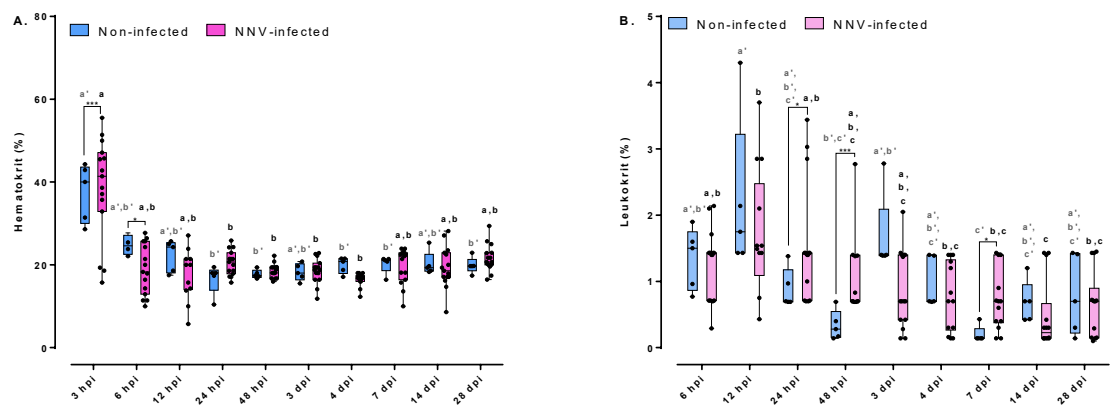

**Figure S5.** **(A)** Hematocrit (Hct) and **(B)** leukokrit (Lct) of non-infected and NNV-challenged European sea bass for 0 to 28 dpi time points. Data are presented as bounds of box and whisker plots with min-to-max values. The line represents the median (non-infected:  $n = 5$ ; NNV challenged:  $n = 15$ ), the whiskers show the data range and the box shows the interquartile range. The unpaired t-test was used to determine statistical differences between infected and non-infected groups (one asterisk indicate  $p < 0.05$ , three asterisks indicate  $p < 0.001$ ). One-way ANOVA with Dunn's post hoc test were applied to determine differences between sampling time points. Different lower-case letters denote statistically significant differences.

**Table S1.** Summary of the analyzed RNA-seq libraries total reads and alignment statistics.

| Sample          | Total reads | Aligned one time  | Aligned multiple times | Overall Alignment  | Not Aligned       |
|-----------------|-------------|-------------------|------------------------|--------------------|-------------------|
| Inf 14dpi_1     | 24,860,558  | 3,590,113 (14.4%) | 19,079,522 (76.7%)     | 22,669,635 (91.2%) | 2,190,923 (8.8%)  |
| Inf 14dpi_2     | 23,822,187  | 3,463,233 (14.5%) | 18,883,599 (79.3%)     | 22,346,832 (93.8%) | 1,475,355 (6.2%)  |
| Inf 14dpi_3     | 28,617,650  | 5,471,226 (19.1%) | 20,071,299 (70.1%)     | 25,542,525 (89.2%) | 3,075,125 (10.7%) |
| Inf 14dpi_4     | 14,400,548  | 1,875,214 (13%)   | 10,904,782 (75.7%)     | 12,779,996 (88.8%) | 1,620,552 (11.2%) |
| Inf 14dpi_5     | 15,439,357  | 1,974,009 (12.8%) | 12,299,717 (79.7%)     | 14,273,726 (92.4%) | 1,165,631 (7.5%)  |
| Non Inf 14dpi_1 | 13,151,000  | 1,949,129 (14.8%) | 10,062,151 (76.5%)     | 12,011,280 (91.3%) | 1,139,720 (8.7%)  |
| Non Inf 14dpi_2 | 17,669,423  | 2,776,674 (15.7%) | 13,516,718 (76.5%)     | 16,293,392 (92.2%) | 1,376,031 (7.8%)  |
| Non Inf 14dpi_3 | 15,990,321  | 2,222,783 (13.9%) | 12,727,551 (79.6%)     | 14,950,334 (93.5%) | 1,039,987 (6.5%)  |
| Non Inf 14dpi_4 | 15,007,899  | 2,143,027 (14.8%) | 12,295,366 (81.9%)     | 14,438,393 (96.2%) | 569,506 (3.8%)    |

**Table S2.** Primers and probes used in the present work.

| Gene                    | Primer sequence (5′ - 3′)              | Accession number | Product size (bp) | Efficiency (%) | Reference    |
|-------------------------|----------------------------------------|------------------|-------------------|----------------|--------------|
| NNV load quantification |                                        |                  |                   |                |              |
| Primers                 | oPVP154: TCCAAGCCGGTCCTAGTCAA          | N/A              | 168/171           | 94             | [3]          |
|                         | oPVP155: CACGAACGTKCGCATCTCGT          |                  |                   |                |              |
| Taqman probe            | tqPVP16: Cy5-CGATCGATCAGCAC-CTSGTCBHQ2 | N/A              | N/A               | N/A            | [3]          |
| Interferon pathway      |                                        |                  |                   |                |              |
| IRF7                    | Up: GGTGGTTCCTCTGATCTGTCTG             | KP861885.1       | 89                | 99             | Present work |
|                         | Dp: TCTGTAGGCTGACATTGGCG               |                  |                   |                |              |
| ISG12                   | Up: AACATGGACCCTGGTACAGC               | FN665389.1       | 141               | 102            | Present work |
|                         | Dp: CGCAGCAACAGACATCACTT               |                  |                   |                |              |
| MxA                     | Up: AAAGGGACAGCCAGAGAACA               | JN807551.1       | 97                | 108            | Present work |
|                         | Dp: ACAAGGAACAACCACCAAGC               |                  |                   |                |              |
| Cytokines               |                                        |                  |                   |                |              |
| IL-1b                   | Up: ATTACCCACCACCCACTGAC               | AJ269472.1       | 151               | 97             | Present work |
|                         | Dp: TCTCTTCCACTATGCTCTCCAG             |                  |                   |                |              |
| IL-10                   | Up: CTGTCCATCTTGGTCGTCTTATC            | AM268529.1       | 119               | 109            | Present work |
|                         | Dp: TCTGCTCTGAGTTGCCTTAAC              |                  |                   |                |              |
| STAT3                   | Up: GGTGTGGTTGGACAACATTATT             | JF810898.1       | 100               | 90             | Present work |
|                         | Dp: CCTCTCCCTCTCCTTACTGATA             |                  |                   |                |              |
| TNFa                    | Up: TCACCACAGAGCACTGGAAG               | DQ070246.1       | 154               | 86             | Present work |
|                         | Dp: GACCGATCTCCACATCACCT               |                  |                   |                |              |
| Immunoglobulins         |                                        |                  |                   |                |              |
| IgHM                    | Up: GCTGCCTCCAATAGAACATACT             | KY173353.1       | 101               | 98             | Present work |
|                         | Dp: CATCAACAAGCCAAGACACAAA             |                  |                   |                |              |
| T-cell markers          |                                        |                  |                   |                |              |
| CD4                     | Up: TGAAGTGCCTTATGACCCTAAA             | AM849811.1       | 82                | 89             | Present work |
|                         | Dp: GTCTCCACTGTCTCCATCTTTC             |                  |                   |                |              |
| CD8a                    | Up: GCCTTCTTCTTCTACTCCTCATC            | AJ846849.2       | 132               | 89             | Present work |
|                         | Dp: CGTGTCTGTGTGTCATCATTTG             |                  |                   |                |              |
| Antimicrobials peptides |                                        |                  |                   |                |              |

|           |                            |            |     |     |              |
|-----------|----------------------------|------------|-----|-----|--------------|
| Hepcidin  | Up: ATCGTGGAAGATGCCGTATAAC | KJ890399.1 | 92  | 88  | Present work |
|           | Dp: CCCTCATATTAGGACAGCAACC |            |     |     |              |
| Reference |                            |            |     |     |              |
| b-actin   | Up: GATCTGGCATCACACCTTCTAC | AJ537421.1 | 104 | 112 | Present work |
|           | Dp: TCTTCTCCCTGTTGGCTTTG   |            |     |     |              |

\* N/A: Non applicable.

## References

1. Datta, S.N.; Kaur, V.I.; Dhawan, A.; Jassal, G. Estimation of length-weight relationship and condition factor of spotted snakehead *Channa punctata* (Bloch) under different feeding regimes. Springerplus. 2013, 2:436. doi: 10.1186/2193-1801-2-436.
2. Gupta, N.; Gupta, D.K.; Sharma, P.K. Condition factor and organosomatic indices of parasitized *Rattus rattus* as indicators of host health. J. Parasit. Dis. 2017, 41(1):21-28. doi: 10.1007/s12639-015-0744-3.
3. Baud, M.; Cabon, J.; Salomoni, A.; Toffan, A.; Panzarin, V.; Bigarré, L. First generic one step real-time Taqman RT-PCR targeting the RNA1 of betanodaviruses. Virol. Methods 2015, 211, 1-7. doi: 10.1016/j.jviromet.2014.09.016.

**Disclaimer/Publisher's Note:** The statements, opinions and data contained in all publications are solely those of the individual author(s) and contributor(s) and not of MDPI and/or the editor(s). MDPI and/or the editor(s) disclaim responsibility for any injury to people or property resulting from any ideas, methods, instructions or products referred to in the content.
